# Supplementary material
Source: publisher figshare collection journal article supplement (https://tandf.figshare.com/ndownloader/files/14111810)
Supplement: Supplementary file 1 [file 14111810]

**Supporting Information**

Synthesis, crystal structure and photochromic property of a phenethyl viologen bismuth(III) chloride

YU-LIN WANG, XIAO-HE CHEN, WEN SHU, HAO-GE QIN, JIAN-DI LIN*, RONG-GUANG LIN* and NA WEN


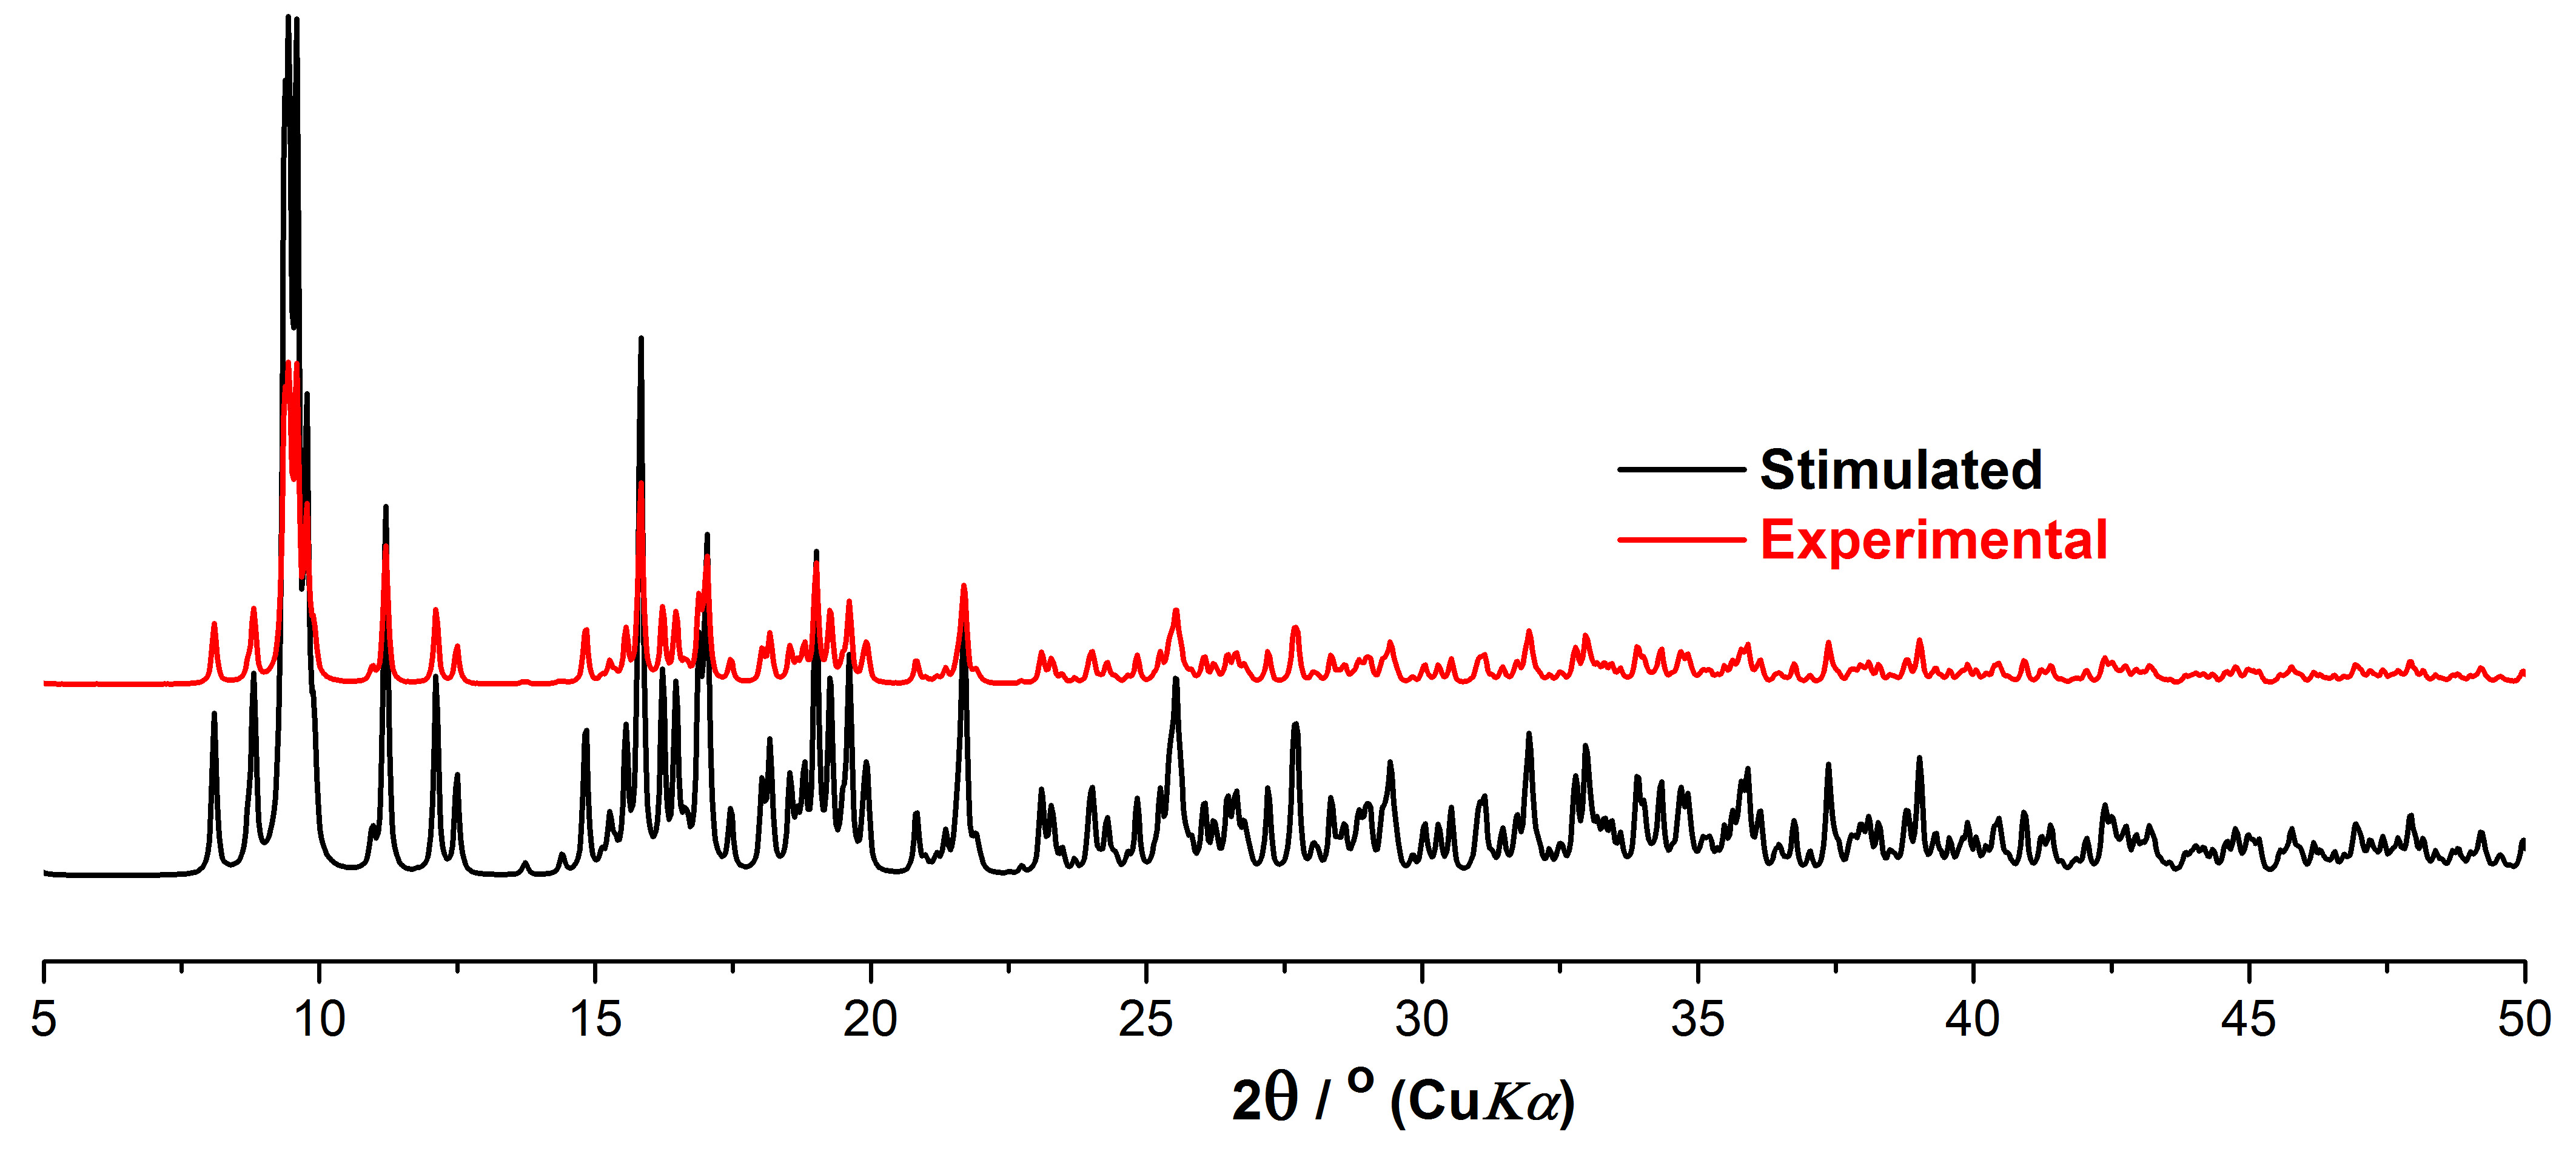


Figure S1. PXRD patterns for **1**.


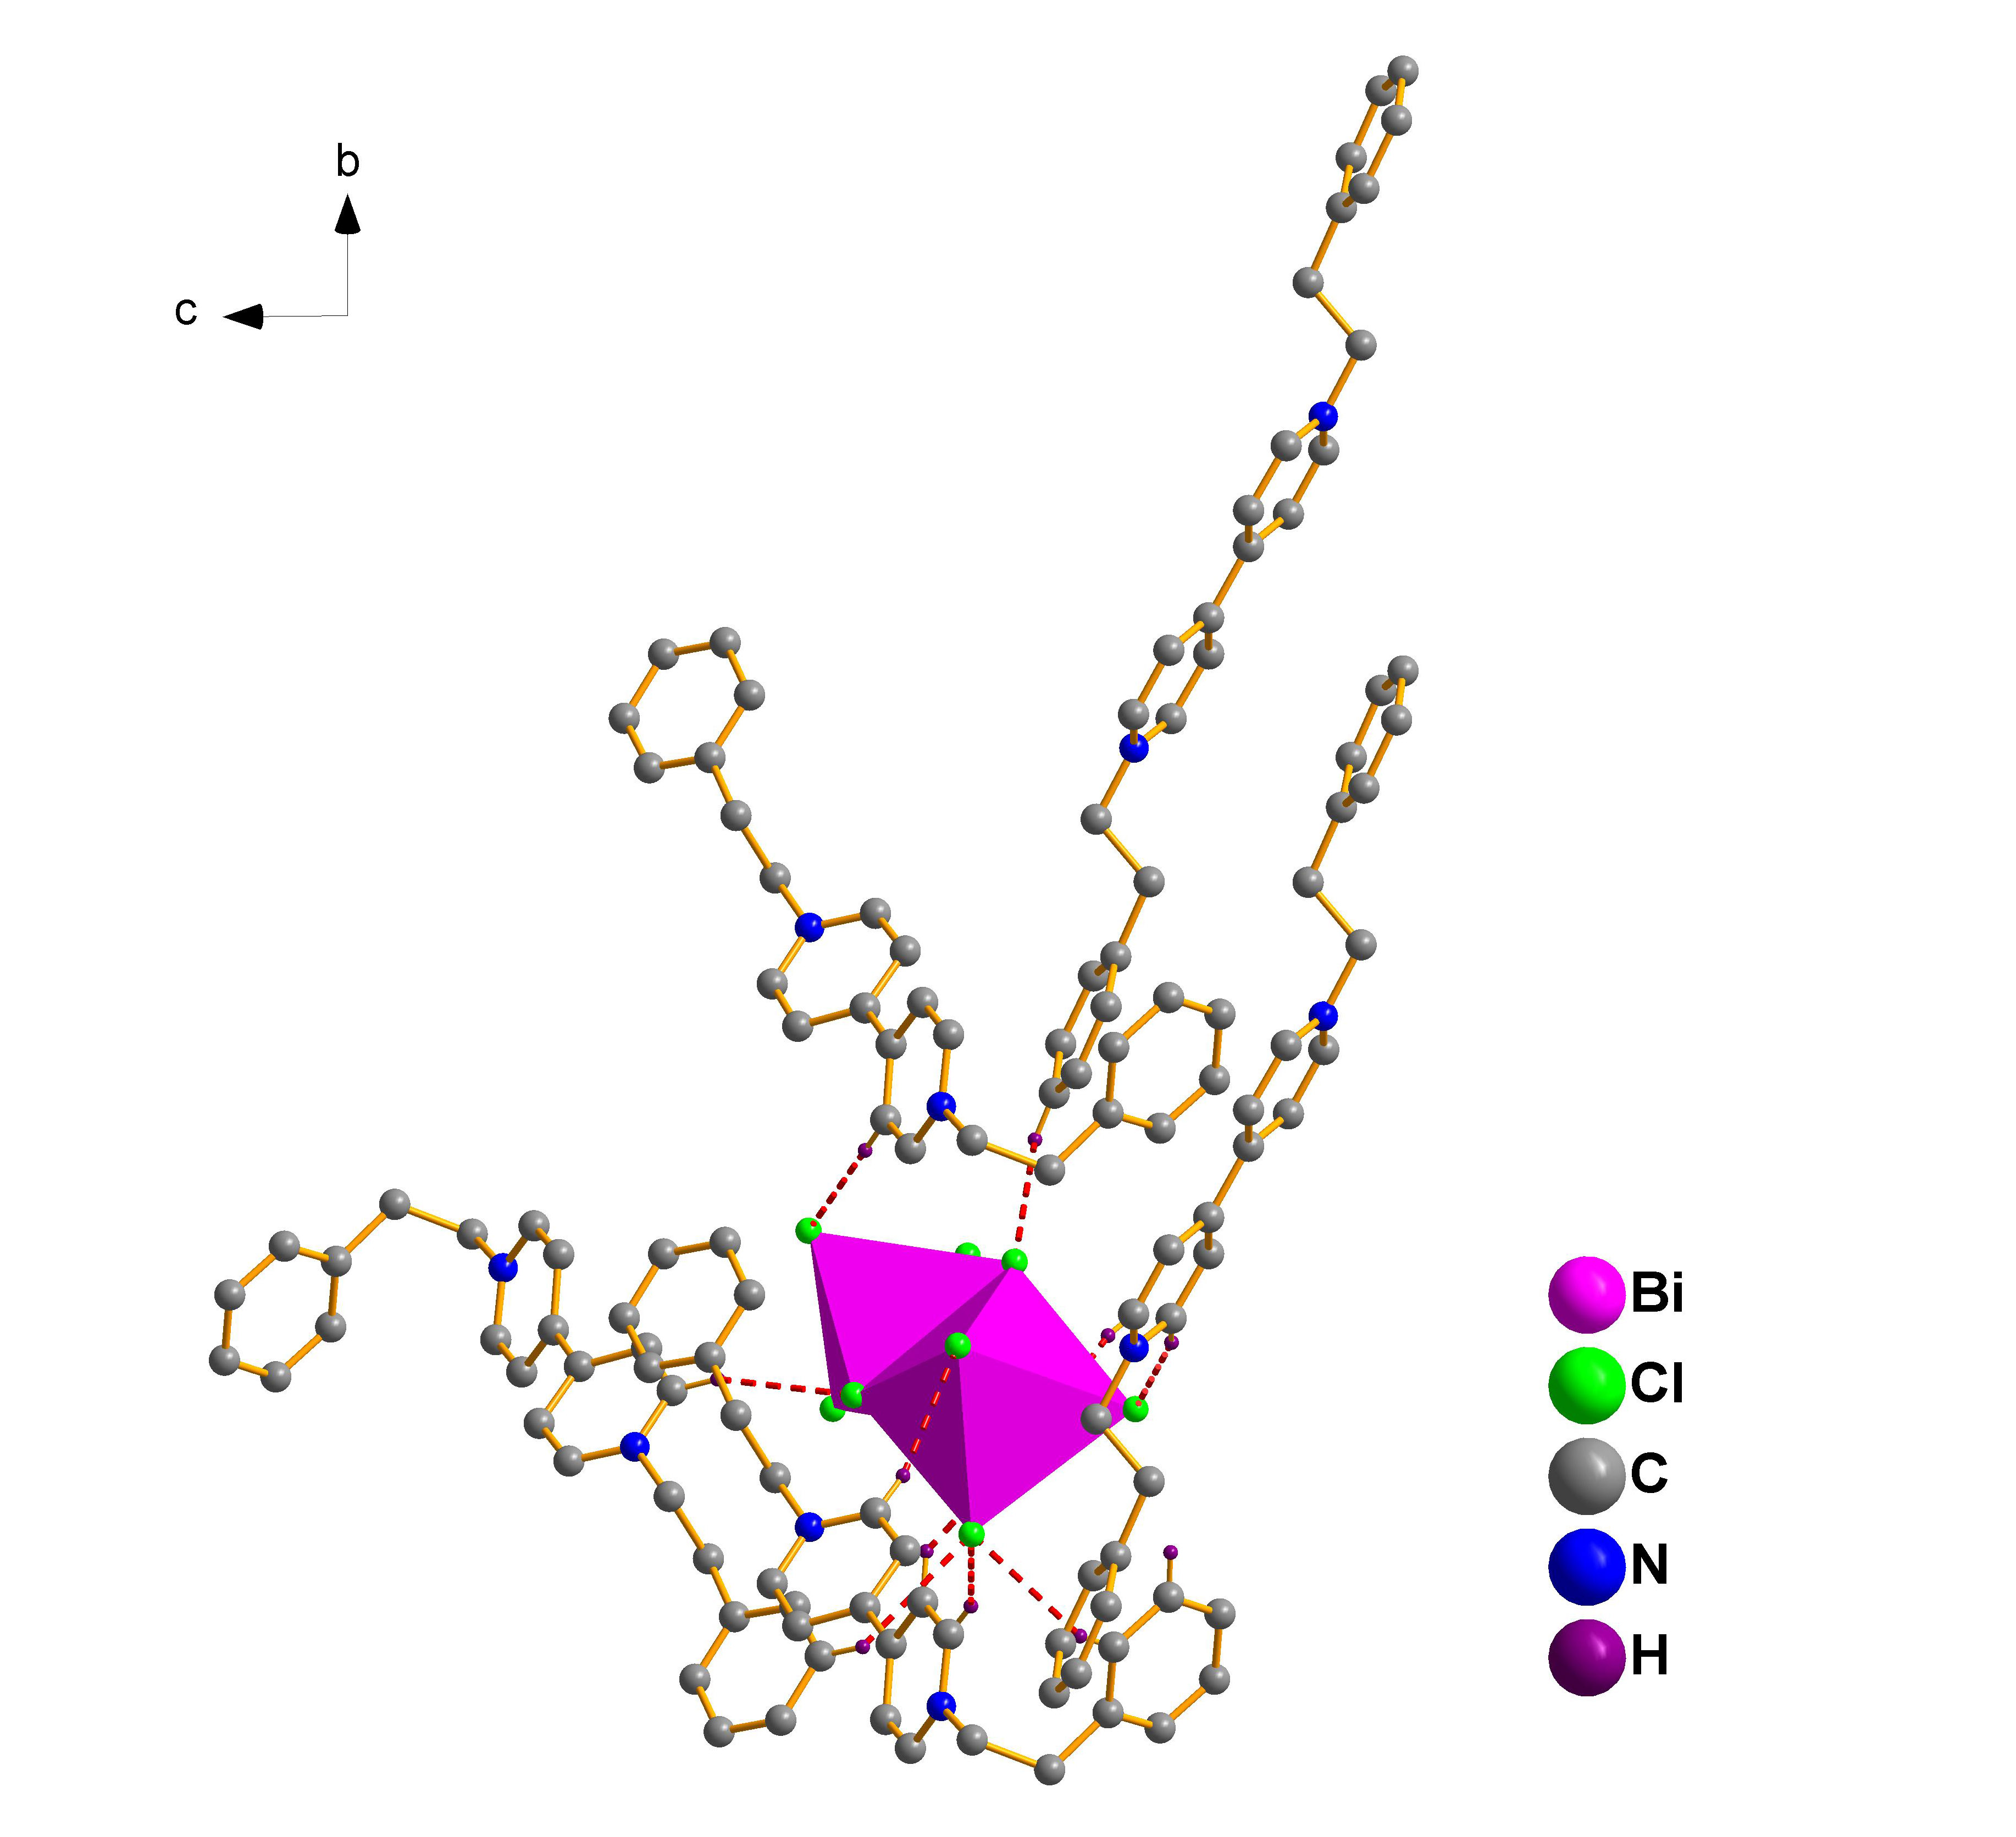


Figure S2. View of the crystal packing (along the *a* axis) constructed by one of the discrete [Bi2Cl9]3– anions and seven PeV2+ cations. Only hydrogens involved in supramolecular interactions are shown for clarity.

Table S1. The reaction mixture and reaction conditions of **1** and related compounds discussed in the synthesis section.

| Starting materials | HCl | Solvent | Reaction temperature | Molar ratio of BiCl3/4,4′-bipyridine | Atom molar ratio of Bi/Cl in the product | Reference |
| --- | --- | --- | --- | --- | --- | --- |
| 1.26 mmol BiCl3 + 1.22 mmol 4,4′-bipyridine | 1 mL | 10 mL phenylethyl alcohol | 150 °C | 1.03:1 | 0.22:1 | This work |
| 0.63 mmol BiCl3 + 0.38 mmol 4,4′-bipyridine | 2 mL | 8 mL phenylethyl alcohol + 1 mL CH3OH | 130 °C | 1.66:1 | 0.20:1 | Inorg. Chem., 2013, 52, 1199 |
| 0.63 mmol BiCl3 + 0.38 mmol 4,4′-bipyridine | 2 mL | 8 mL benzyl alcohol | 140 °C | 1.66:1 | 0.20:1 | Inorg. Chem., 2013, 52, 1199 |
| 0.32 mmol BiCl3 + 1.22 mmol 4,4′-bipyridine | 1 mL | 9 mL phenylethyl alcohol | 130 °C | 0.26:1 | 0.20:1 | Inorg. Chem., 2013, 52, 1199 |
| 0.63 mmol BiCl3 + 0.57 mmol 4,4′-bipyridine | 1 mL | 9 mL benzyl alcohol | 140 °C | 1.11:1 | 0.20:1 | Inorg. Chem., 2014, 53, 5538 |
| 0.63 mmol BiCl3 + 0.38 mmol 4,4′-bipyridine | 1 mL | 9 mL benzyl alcohol | 140 °C | 1.66:1 | 0.21:1 | Inorg. Chem., 2014, 53, 5538 |

Table S2. C–H···π interactions bond donor/acceptor scheme (Å, ) for **1**.

| C–HCg | HCg (Å) | CCg (Å) | <C–HCg () |
| --- | --- | --- | --- |
| C(107)–H(107)Cg(1)a | 2.99 | 3.875(19) | 152 |
| C(115)–H(115)Cg(2)b | 2.96 | 3.543(18) | 122 |

*Symmetry codes*. a: 1+X, -1+Y, Z; b: X, Y, Z;

Cg(1): N(201)–C(209)–C(210)–C(211)–C(212)–C(213);

Cg(2): C(201)–C(202)–C(203)–C(204)–C(205)–C(206)

Table S3. Hydrogen bond distances (Å) and angles (deg) for **1**.

| D–HA | *d*(D–H) | *d*(HA) | *d*(DA) | <(DHA) |
| --- | --- | --- | --- | --- |
| C(109)–H(109)Cl(8) | 0.93 | 2.81 | 3.663(6) | 152 |
| C(110)–H(110)Cl(3) | 0.93 | 2.83 | 3.557(6) | 136 |
| C(112)–H(112)Cl(2)a | 0.93 | 2.72 | 3.652(6) | 175 |
| C(116)–H(116)Cl(9)b | 0.93 | 2.82 | 3.737(6) | 168 |
| C(209)–H(209)Cl(3) | 0.93 | 2.80 | 3.678(6) | 159 |
| C(213)–H(213)Cl(7)b | 0.93 | 2.68 | 3.584(6) | 165 |

*Symmetry codes*. a: x, -1+y, z; b: -1+x, y, z
